# Supplementary material
Source: PubMed Central journal article supplement (PMC3117180)
Supplement: mmc1.pdf [file mmc1.pdf]

## Supplementary Data

### Preliminaries

We consider the following  $\beta \rightarrow \infty$  limit for the reaction diffusion equation with the source function (15)

$$\frac{\partial \phi}{\partial t} = D \frac{\partial^2 \phi}{\partial x^2} - b\phi + \frac{1}{2} \Gamma_I k_b h(x)^2 \frac{n_\infty}{1 + K_e^0} \theta\left(\frac{A_I}{K_m} \phi - \frac{1}{2} k_b h^2 + \frac{1}{\beta} \ln K_e^0\right) \quad (1)$$

where  $\theta(u) = 1$  if  $u \geq 1$  and 0 otherwise. To keep the notation as simple as possible, it will be useful to renormalize  $\phi$  and  $\Gamma_I$  as

$$\psi(x) = A_I \phi(x) / K_m \quad (2)$$

$$\Gamma = A_I \Gamma_I / K_m \quad (3)$$

The source function (15) possesses three zeros,  $\psi_{1,2,3}^*$ , with  $\psi_1^* = 0 < \frac{1}{2} k_b h^2 - 1/\beta \ln K_e^0 < \psi_3^*$  if

$$\frac{\Gamma k_b n_\infty}{b(1 + K_e^0)} > 1 - \frac{2}{\beta k_b h(x)^2} \ln K_e^0 \quad (4)$$

at some value of  $x$ .

### Type 1 and 2 solutions

We derive in this Appendix the condition under which Eq. (1) possesses two families of solutions  $\phi_{1,2}(x)$  with the following properties:

1. Case 1 :  $\psi_1(x) > \frac{1}{2} k_b h(x)^2 - 1/\beta \ln K_e^0$  in some interval  $[-x_0, x_0]$  and  $\psi_1(x) < \frac{1}{2} k_b h(x)^2 - 1/\beta \ln K_e^0$  otherwise;
2. Case 2 :  $\psi_2(x) < \frac{1}{2} k_b h(x)^2 - 1/\beta \ln K_e^0$  in some interval  $[-x_0, x_0]$  and  $\psi_2(x) > \frac{1}{2} k_b h(x)^2 - 1/\beta \ln K_e^0$  otherwise.

Type 1 solutions are maximum at  $x = 0$  but type 2 solutions have two symmetric maxima with a depletion hole centered at  $x = 0$ . The condition of existence of type 2 solution is found by matching the concentration  $\psi(x)$  and the current  $\psi'(x)$  at  $x = \pm x_0$ .

Finding the solution for case 1 is straightforward. First, let us define the error function (1) :

$$\text{Erf}(z_0, z_1) = \frac{2}{\sqrt{\pi}} \int_{z_0}^{z_1} e^{-t^2} dt \quad (5)$$

with  $\text{Erf}(x) = \text{Erf}(0, x)$ . We find in case 1 for  $x \in [-x_0, x_0]$  :

$$\psi_1(x) = u(x)e^{x/\lambda} + v(x)e^{-x/\lambda} + c \cosh(x/\lambda) \quad (6)$$

with

$$u(x) = C_A \text{Erf}(x/w + w/2\lambda, +\infty) \quad (7)$$

$$v(x) = C_A \text{Erf}(-\infty, x/w - w/2\lambda) \quad (8)$$

where

$$C_A = \frac{\sqrt{\pi}}{8\lambda} n_\infty k_b h_0^2 \frac{w}{b} \frac{\Gamma}{1 + K_e^0} e^{w^2/4\lambda^2} \quad (9)$$

The constant  $c$  in (6) is determined by matching Eq. (6) with  $(\frac{1}{2}k_b h(x)^2 - 1/\beta \ln K_e^0) \exp[-(x - x_0)/\lambda]$  at the boundary point  $x = x_0$ . In practice, we can take  $c = 0$  and  $x_0 \rightarrow \infty$  as shown in Fig. 4-a (dashed curve compared to plain curve).

In the limit of small diffusion length,  $\lambda/w \ll 1$ , type 1 solutions have the following asymptotic behavior  $(1 - \text{Erf}(x) \simeq 1/(\sqrt{\pi}x) \exp(-x^2))$  when  $x$  goes to infinity, see (1))

$$\psi_1(x) \simeq \frac{k_b}{2b(1 + K_e^0)} \frac{\Gamma}{w} n_\infty h(x)^2 \quad (10)$$

## Type 2 solution

For type 2 solutions, we have :

$$\psi_2^<(x) = \left[ \frac{1}{2} k_b h(x)^2 - 1/\beta \ln K_e^0 \right] \frac{\cosh(x/\lambda)}{\cosh(x_0/\lambda)} \text{ if } -x_0 < x < x_0 \quad (11)$$

$$\psi_2^>(x) = C_A e^{x/\lambda} \text{Erf}(x/w + w/2\lambda, \infty) \quad (12)$$

$$+ C_A e^{-x/\lambda} \text{Erf}(B, x/w - w/2\lambda) \text{ if } |x| > x_0 \quad (13)$$

where  $x_0$  and  $B$  are found by matching both solutions at  $x = \pm x_0$ . Instead of these conditions, we will use the equivalent conditions at  $x = \pm x_0$  :

$$\psi_2^>(x_0) = \frac{1}{2} k_b h(x_0)^2 - 1/\beta \ln K_e^0 \quad (14)$$

$$\psi_2^<(x_0) + \lambda \psi_2^<'(x_0) = \psi_2^>(x_0) + \lambda \psi_2^>'(x_0) \quad (15)$$

where the second equation gives  $x_0$ . Once done,  $B$  can be found by using the first equation.

## Condition for the existence of type 2 solution

From Eq. (15), one finds that  $x_0$  is solution of the following equation :

$$\begin{aligned} \frac{\lambda}{w} \frac{e^{-(x_0/w + w/2\lambda)^2}}{\text{Erf}(x_0/w + w/2\lambda, \infty)} (1 + \tanh(x_0/\lambda)) \\ = \frac{\sqrt{\pi}}{2} n_\infty k_b \frac{\Gamma}{b(1 + K_e^0)} \left( 1 - 2 \frac{\ln K_e^0}{\beta k_b h(x_0)^2} \right) \end{aligned} \quad (16)$$

In order for (16) to have a solution, we have two conditions :

1. Condition (4) must hold.
2. There exists a minimum value of  $w_0$ , i.e.  $w_c$ , such that for  $w > w_c$ , Eq. (16) has one unique solution. This condition corresponds to  $x_0 = 0$  in (16).

The argument goes as follows for  $\beta \rightarrow \infty$ . For a given  $w_0$ , the lefthand side of (16) is a strictly increasing function of  $x_0$ . Thus, its is minimum for  $x_0 = 0$ , since  $x_0$  is positive. However,

$$\frac{\lambda}{w} \frac{e^{-(w/2\lambda)^2}}{\text{Erf}(w/2\lambda)} \quad (17)$$

decreases with increasing  $w/\lambda$ . Thus, for  $w < w_c$  defined by

$$\frac{\lambda}{w_c} \frac{e^{-(w_c/2\lambda)^2}}{\text{Erf}(w_c/2\lambda)} = \frac{\sqrt{\pi}}{2} n_\infty k_b h_0^2 \frac{\Gamma}{b(1 + K_e^0)} \quad (18)$$

(16) cannot have a solution, since the lefthand side of (16) is always larger than the righthand side. Moreover,  $\lambda/w e^{-(w_c/2\lambda)^2} / \text{Erf}(w_c/2\lambda) > \sqrt{\pi}/2$ . The last inequality implies condition (4) for the source function to have three zeros.

# Bibliography

- [1] Abramowitz, M., and I. Stegun. 1972. Handbook of Mathematical Functions. National Bureau of Standards.
